# Supplementary material for: Trends and spatial shifts in lightning fires and smoke concentrations in response to 21st century climate over the national forests and parks of the western United States
Source: Copernicus journal article supplement (doi:10.5194/acp-20-8827-2020), 2020-07-27
Supplement: Supplementary file 1 [file acp-20-8827-2020-supplement.pdf]

Supplement of Atmos. Chem. Phys., 20, 8827–8838, 2020  
<https://doi.org/10.5194/acp-20-8827-2020-supplement>  
© Author(s) 2020. This work is distributed under  
the Creative Commons Attribution 4.0 License.

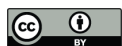

*Supplement of*

## **Trends and spatial shifts in lightning fires and smoke concentrations in response to 21st century climate over the national forests and parks of the western United States**

**Yang Li et al.**

*Correspondence to:* Yang Li ([yangli@seas.harvard.edu](mailto:yangli@seas.harvard.edu))

The copyright of individual parts of the supplement might differ from the CC BY 4.0 License.

12

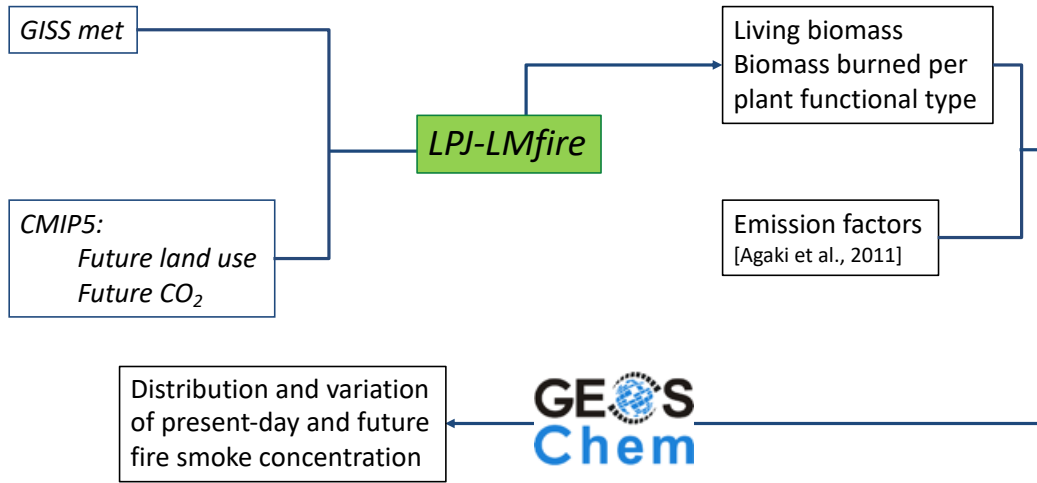

13

14 **Fig. S1.** Flowchart of modeling setup.

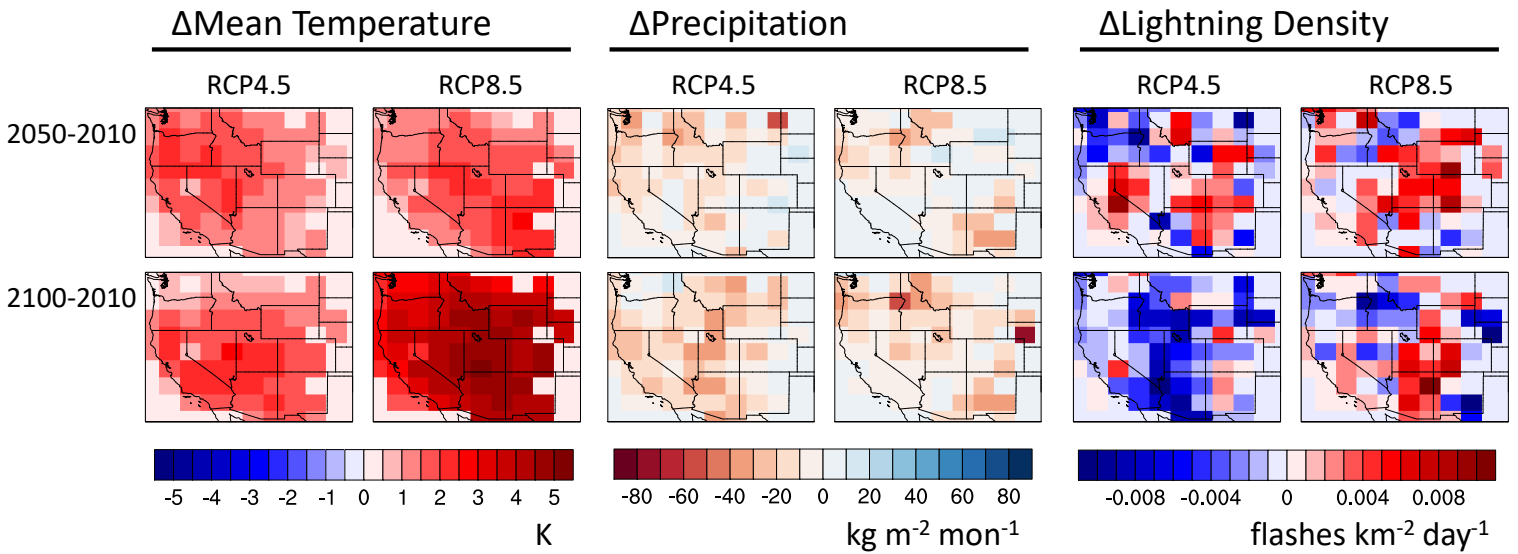

16

17 **Fig. S2.** Changes in monthly mean temperature, precipitation and lightning density averaged  
 18 over the fire season in the western U.S. for the RCP4.5 and RCP8.5 scenarios. The top row  
 19 shows changes between the present day and 2050, and the bottom row shows changes between  
 20 the present day and 2100. Temperature and precipitation are from GISS-E2-R for the RCP4.5  
 21 and RCP8.5 scenarios, with five years representing each time period. Lightning density is  
 22 calculated using the GISS convective mass flux following the empirical parameterization of  
 23 *Magi* [2015]. The fire season is July, August, and September.

24

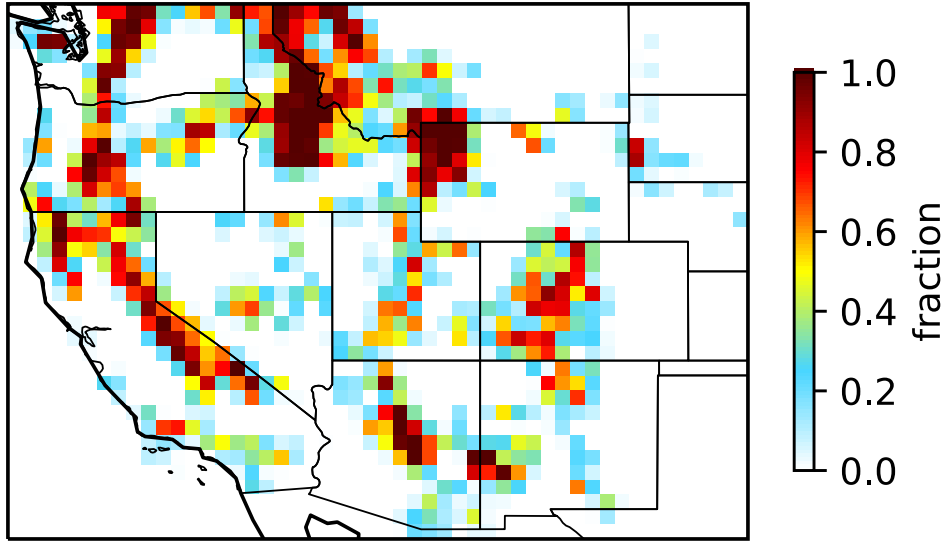

25

26 **Fig. S3.** Map of the National Forest and Park fraction.

27

## 28 **Evaluation of LPJ-LMfire fire emissions**

29           We first evaluate the lightning-caused wildfire emissions from LPJ-LMfire over the  
30 National Forests in the western U.S. by comparing with the Global Fire Emissions Database  
31 (GFED4s) emissions over the same regions (Fig. S4). Lightning is the dominant fire source over  
32 the western U.S. forests, allowing a reasonable comparison between the two emission inventories  
33 over the forest areas in the West. The total fire-season dry matter burned (DM) over National  
34 Forests and Parks from LPJ-LMfire is 22.11 Tg for July-August-September (JAS), comparable to  
35 that from GFED4s (19.89 Tg), providing confidence in the LPJ-LMfire representation of fires  
36 without active suppression. GFED4s shows greater DM over northern Washington, Idaho, and  
37 northern California than LPJ-LMfire but overall the spatial mismatches are not large.

38           We then validate the carbonaceous fine particulate matter ( $PM_{2.5}$ ; BC+OC) generated by  
39 GEOS-Chem in a simulation with the combined emissions (LPJ-LMfire over the National Forests  
40 and Parks and GFED4s elsewhere) during JAS. Simulated BC and OC also include contributions  
41 from non-fire sources, such as fossil fuel combustion from transportation, industry, and power  
42 plants. We compare the GEOS-Chem results against ground-based measurements from the  
43 Interagency Monitoring of Protected Visual Environments (IMPROVE) network in the western  
44 U.S. We find that GEOS-Chem generally reproduces the IMPROVE observations, with elevated  
45 concentrations ( $\sim 3.0\text{-}5.0 \mu\text{g m}^{-3}$ ) over the northern states and in California (Fig. S5). The finer-  
46 resolution simulation provides more detailed distributions of fire activity in the western U.S.,  
47 which are of greater utility to environmental managers. In JAS, large amounts of smoke PM are  
48 transported from Canada, as implied by some IMPROVE observations in Idaho and Montana.  
49 GFED4s includes the smoke from these Canadian fires, as reflected by elevated smoke PM in the  
50 northeast corner of the domain in the GEOS-Chem results. Results in RCP8.5 for the present-day

51 are similar to those under RCP4.5 (not shown). We also compare 5-year fire-season averages of  
52 smoke PM in each grid cell in the western U.S. from GEOS-Chem against those from IMPROVE  
53 observations (Fig. S6). The GEOS-Chem simulation with combined emissions generally  
54 reproduces smoke PM within an uncertainty of 50%.

55

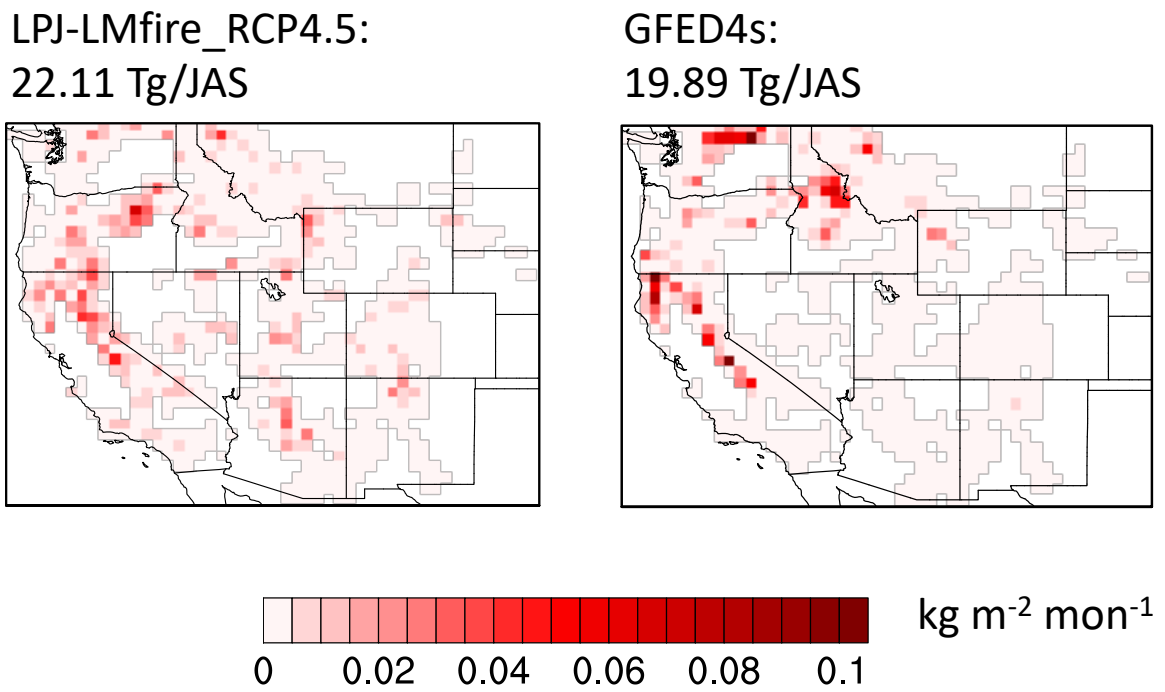

56

57 **Fig. S4.** Present-day (2011-2015) fire-season averaged lightning-caused dry matter burned (DM)  
58 over the national forests and parks in the western U.S. for LPJ RCP4.5 and GFED4s. Value are  
59 the total fire-season DM over the national forests and parks in the two inventories. The fire  
60 season is July, August, and September. White spaces indicate areas outside the national forests  
61 and parks.

62

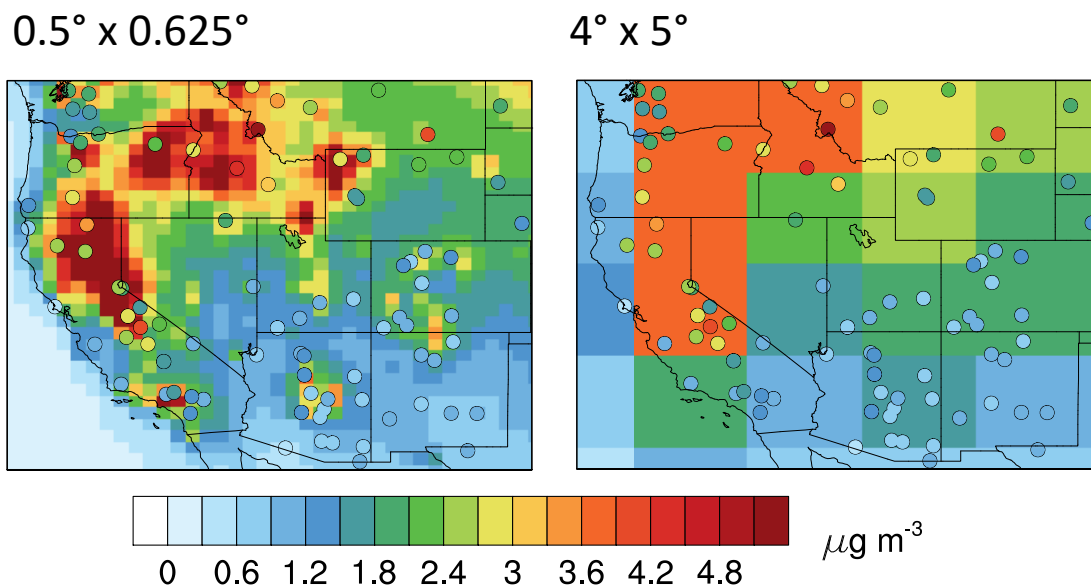

63  
 64 **Fig. S5.** Fire-season averaged smoke PM. Circles represent ground-based observations from the  
 65 IMPROVE network. The colored background is from GEOS-Chem simulations at 0.5° x 0.625°  
 66 and 4° x 5° spatial resolutions for the present-day (2011-2015) using the combined fire emissions  
 67 from LPJ-LMfire over the national forests and parks and GFED4s over other regions. The fire  
 68 season is July, August, and September.  
 69

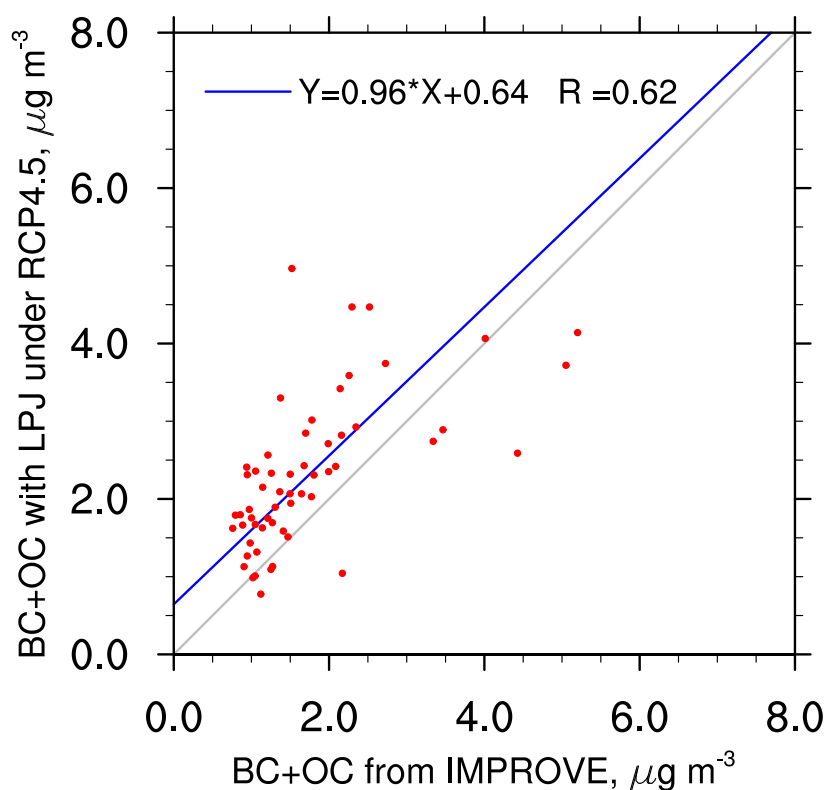

70  
 71 **Fig. S6.** BC+OC concentrations simulated with the present-day combined fire emissions from  
 72 LPJ RCP4.5 (over National Forests) and GFED4s (over other regions) compared to those from  
 73 IMPROVE observations. Each dot represents the 5-year fire-season average of concentrations in  
 74 each grid square (with the resolution of  $4^\circ \times 5^\circ$ ) across the western U.S. The blue line is the fitted  
 75 line using reduced major axis (RMA) regression between the GEOS-Chem simulations and those  
 76 from IMPROVE. The grey line denotes the 1:1 line.  
 77



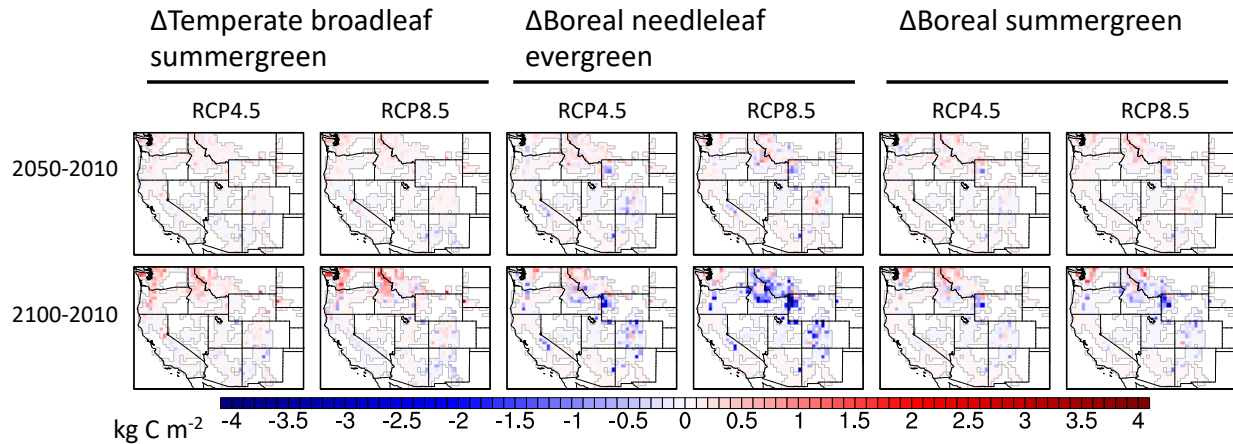

78

79 **Fig. S7.** Simulated changes in living biomass for the three most dominant plant functional types

80 over the national forests and parks in the western U.S. for the RCP4.5 and RCP8.5 scenarios.

81 The top row shows changes between the present day and 2050, and the bottom row shows

82 changes between the present day and 2100. Results are from LPJ-LMfire, with five years

83 representing each time period. The fire season is July, August, and September. White spaces

84 indicate areas outside the national forests and parks.

85

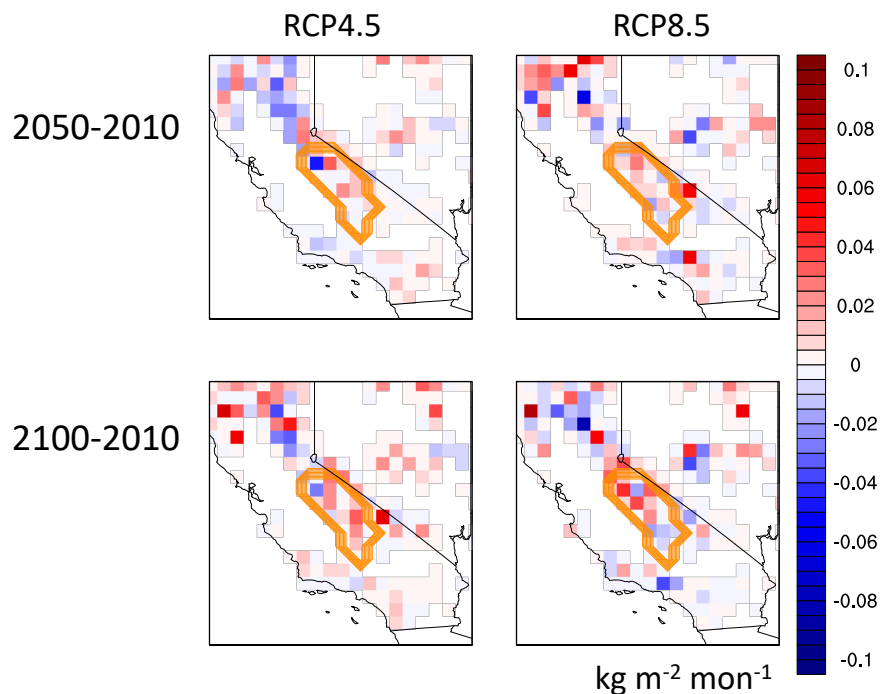

86

87 **Fig. S8.** Simulated changes in monthly mean lightning-caused DM averaged over the fire season

88 over the national forests and parks in California for the RCP4.5 and RCP8.5 scenarios. The top

89 row shows changes in DM between the present day and 2050, and the bottom row shows

90 changes between the present day and 2100. Results are from LPJ-LMfire for the RCP4.5 and

91 RCP8.5 scenarios, with five years representing each time period. The fire season is July, August,

92 and September. Bold orange lines mark the boundaries of the Sierra Nevada (SN). White spaces

93 indicate areas outside the national forests and parks.

94

95

96 **Table S1.** Reclassification of LPJ-LMfire PFTs.

| <b>LPJ-LMfire (9 pfts)</b>      | <b>GEOS-Chem (6 pfts)</b>                                  |
|---------------------------------|------------------------------------------------------------|
| Tropical broadleaf evergreen    | Tropical forest                                            |
| Tropical broadleaf raingreen    | Tropical forest                                            |
| Temperate needleleaf evergreen  | Temperate forest                                           |
| Temperate broadleaf evergreen   | Temperate forest                                           |
| Temperate broadleaf summergreen | Temperate forest                                           |
| Boreal needleleaf evergreen     | Boreal forest                                              |
| Boreal summergreen              | Boreal forest                                              |
| C <sub>3</sub> grass            | Crop, pasture                                              |
| C <sub>4</sub> grass            | 50% -> savanna, grassland, shrubland; 50% -> crop, pasture |

97
